# Supplementary material for: Physicochemical characterization of metal hexacyanometallate–TiO2composite materials
Source: Royal Society of Chemistry journal article supplement (doi:10.1039/c5ra03458b), 2015-01-01
Supplement: c5ra03458b1.pdf [file c5ra03458b1.pdf]

Supporting information for

## “Physicochemical Characterization of Hexacyanometallate-TiO<sub>2</sub> Composite Materials”

Mario Berrettoni,<sup>a,b\*</sup> Michela Ciabocco,<sup>a</sup> Marzia Fantauzzi,<sup>d,e</sup> Marco Giorgetti,<sup>b,c</sup> Antonella Rossi<sup>d,e</sup> and Eugenio Caponetti<sup>f</sup>

<sup>a</sup> Dipartimento di Chimica Industriale “Toso Montanari”, UOS, Campus di Rimini, Università di Bologna, Via dei Mille 39, 47921 Rimini – Italy. E-mail: mario.berrettoni@unibo.it

<sup>b</sup> INSTM, Udr Bologna – Italy.

<sup>c</sup> Dipartimento di Chimica Industriale “Toso Montanari”, Università di Bologna – Italy.

<sup>d</sup> Dipartimento di Scienze Chimiche e Geologiche, Università degli Studi di Cagliari, Campus di Monserrato S.S. 554 – Italy and INSTM, Udr Cagliari – Italy.

<sup>e</sup> Centro Grandi Strumenti Università degli Studi di Cagliari – Campus di Monserrato S.S. 554 – Italy.

<sup>f</sup> Dipartimento STEBICEF Università degli studi di Palermo – Italy.

### Cyclic Voltammetry

Fig. S1 and S2 show the CV results for the compounds synthesized in 1:1 ratio.

Within the experimental error, our slopes of 56 mV and 52 mV, as shown in the inserts, are consistent with a single electron redox process involving K<sup>+</sup>.

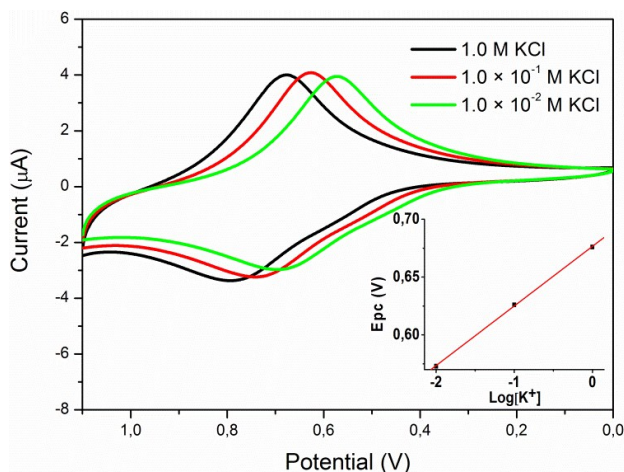

**Fig. S1** CVs at 0.1 V/s of TiO<sub>2</sub>-CoHCF 1:1 recorded in KCl solutions at different concentrations (1.0, 1.0 × 10<sup>-1</sup>, 1.0 × 10<sup>-2</sup> M).

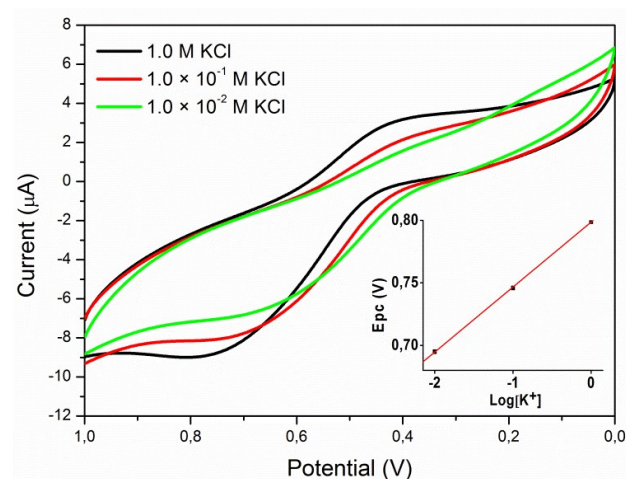

**Fig. S2** CVs at 0.1 V/s of TiO<sub>2</sub>-FeHCC 1:1 recorded in KCl solutions at different concentrations (1.0, 1.0 × 10<sup>-1</sup>, 1.0 × 10<sup>-2</sup> M).

### TEM micrographs

Fig. S3a,b show the typical spherical aggregate of TiO<sub>2</sub> particles covered with cubic aggregate of CoHCF (1:1 ratio) and with cubic aggregate of FeHCC (1:1 ratio).

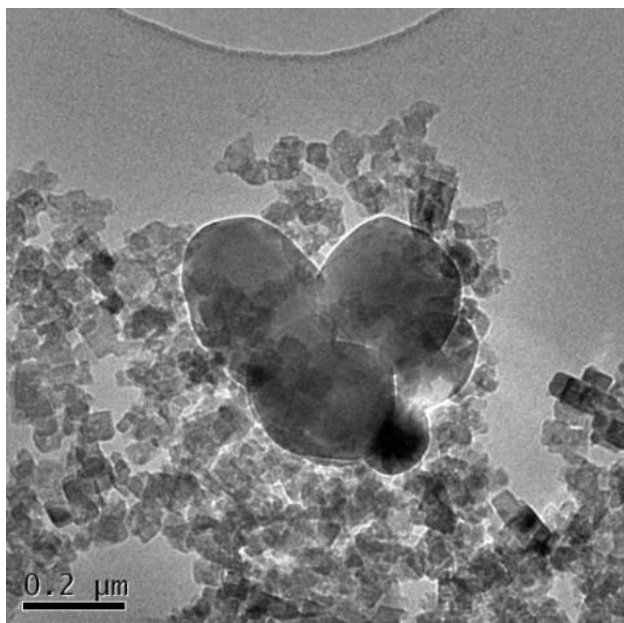

**Fig. S3a** Typical spherical aggregate of  $\text{TiO}_2$  particles covered with cubic aggregate of CoHCF (1:1 ratio).

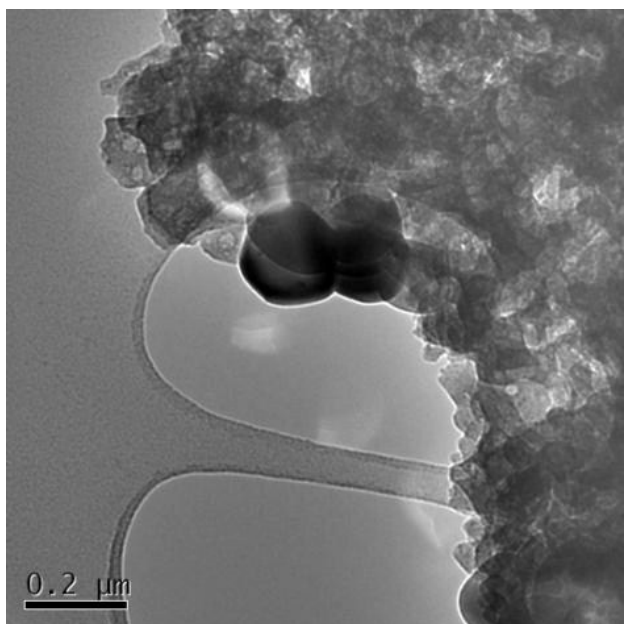

**Fig. S3b** Typical spherical of aggregate of  $\text{TiO}_2$  particles covered with cubic aggregate of FeHCC (1:1 ratio).

## XPS Spectra

Survey spectra were acquired in fixed analyzer transmission mode (FAT) using a pass energy (PE) of 200 eV, while the high-resolution spectra of C1s, Cl2p, Co2p, Fe2p, K2p, N1s, O1s, Ti2p were collected with a PE of 100 eV selecting the standard lens mode; the full-width at half-maximum of the peak height, FWHM, of the silver  $\text{Ag}3d_{5/2}$  signal for the high-resolution spectra was 0.83 eV. To verify the linear response of the instrument, periodic calibrations were performed according to ISO 15472:2001.<sup>1</sup>

Data were acquired under computer control (Avantage v 3.45). The spectra were processed using CASAXPS software.<sup>2</sup> An iterated Shirley – Sherwood<sup>3</sup> background subtraction routine was performed before curve fitting using the product of Gaussian and Lorentzian functions was used for curve fitting. Composition was calculated using the first-principle method<sup>4</sup> assuming the homogeneity of the sample. Peak areas were corrected for the sensitivity factors calculated using Scofield's photoionization cross-sections  $\sigma$ ,<sup>5</sup> for the asymmetry parameter,<sup>6</sup> the inelastic mean free paths (IMFP) and the intensity/energy analyzer response whose details are reported in literature.<sup>7</sup>

IMFP were calculated according to Seah et al.<sup>8</sup> The accuracy of the calculated atomic concentrations is estimated to be  $\pm 10\%$ .

Survey spectra of pure CoHCF and  $\text{TiO}_2$ -CoHCF samples are shown in Fig. S4, while in Fig. S5 are reported the survey spectra of pure FeHCC and  $\text{TiO}_2$ -FeHCC samples.

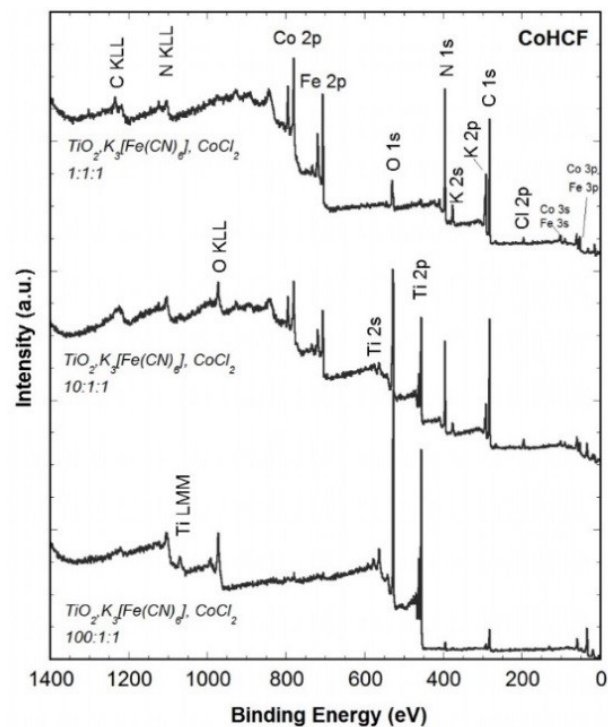

**Fig. S4** XPS survey spectra of the samples  $\text{TiO}_2$ -CoHCF in 1:1, 10:1 and 100:1 ratios. X-ray source used: monochromatic AlK $\alpha$ .

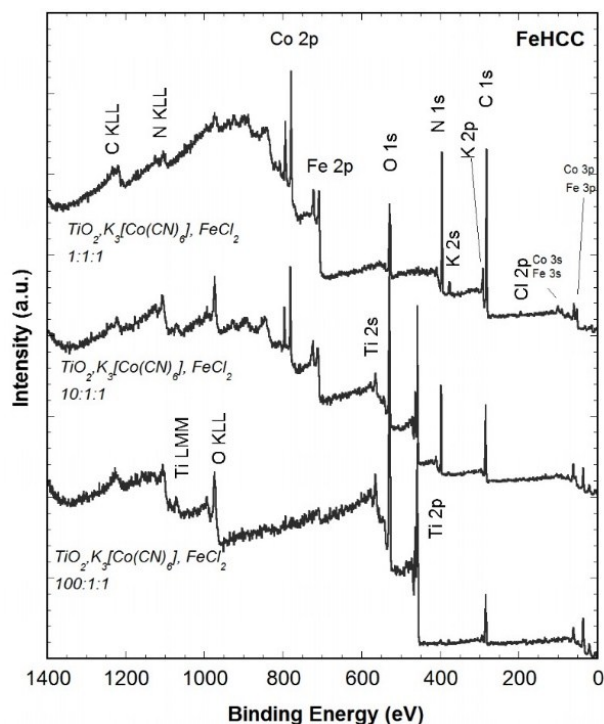

Fig. S5 XPS survey spectra of the samples  $\text{TiO}_2$ : FeHCC in 1:1, 10:1 and 100:1 ratios. X-ray source used: monochromatic  $\text{AlK}\alpha$ .

## Fe $2p_{3/2}$ and Co $2p_{3/2}$

High resolution XPS spectra of Fe $2p_{3/2}$  and Co $2p_{3/2}$  signals of pure CoHCF, pure FeHCC and  $\text{TiO}_2$ -MHCM samples are shown in Fig. S6 and S7 for CoHCF and FeHCC respectively.

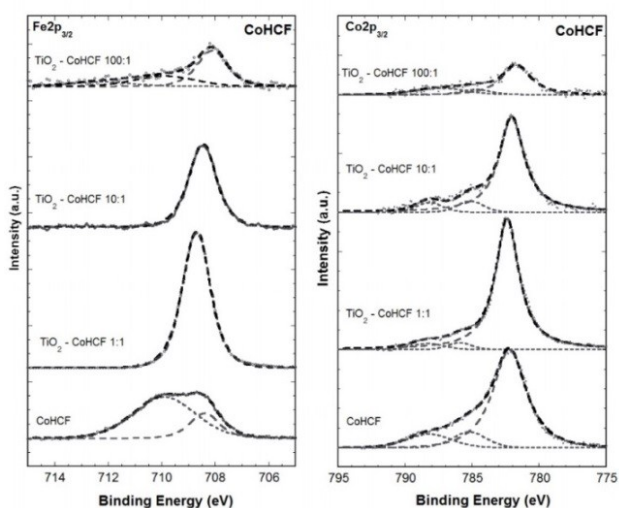

Fig. S6 Fe $2p_{3/2}$  and Co $2p_{3/2}$  XPS high resolution spectra for CoHCF compounds.

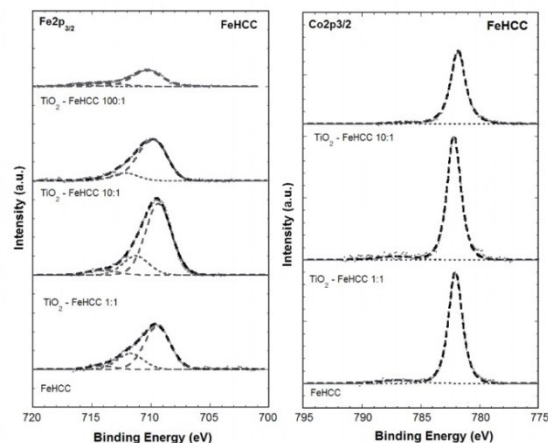

Fig. S7 Fe $2p_{3/2}$  and Co $2p_{3/2}$  XPS high-resolution spectra of FeHCC compounds.

## N1s

Detailed curve fitted N1s spectra of all the samples analyzed in this work are presented in Fig. S8 (CoHCF series) and in Fig. S9 (FeHCC series).

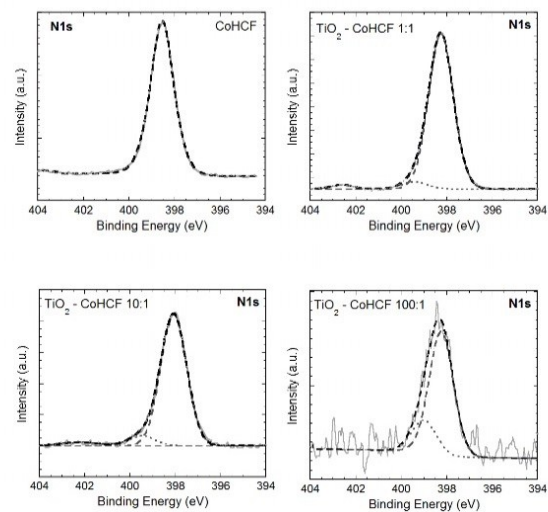

Fig. S8 N1s signal from CoHCF compounds.

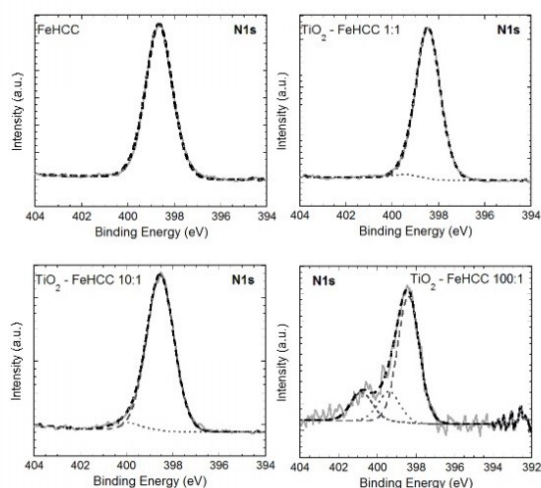

Fig. S9 N1s signal from FeHCC compounds.

In  $\text{TiO}_2$ -FeHCC 100:1 (Fig. S8) a third component appears at  $\sim 400.8$  eV, together with the main peak at about  $398.3 \pm 0.2$  eV, ascribed to nitrogen of the cyano-groups coordinating a transition metal, and the less intense peak at  $399.5 \pm 0.2$  eV, ascribed to the formation of  $\text{M}-\text{CN}-\text{Ti}$  surface complexes. By comparison with literature data the higher BE component in the  $\text{TiO}_2$ -FeHCC 100:1 sample could be ascribed to substituted amines or organic nitroso groups (<http://srdata.nist.gov/xps/> last access 22 February 2014). According to experimental section all the samples were synthesized in the same way, so it is impossible for us to formulate a hypothesis of the appearance of the third peak on the basis of the synthetic procedure.

## Ti2p

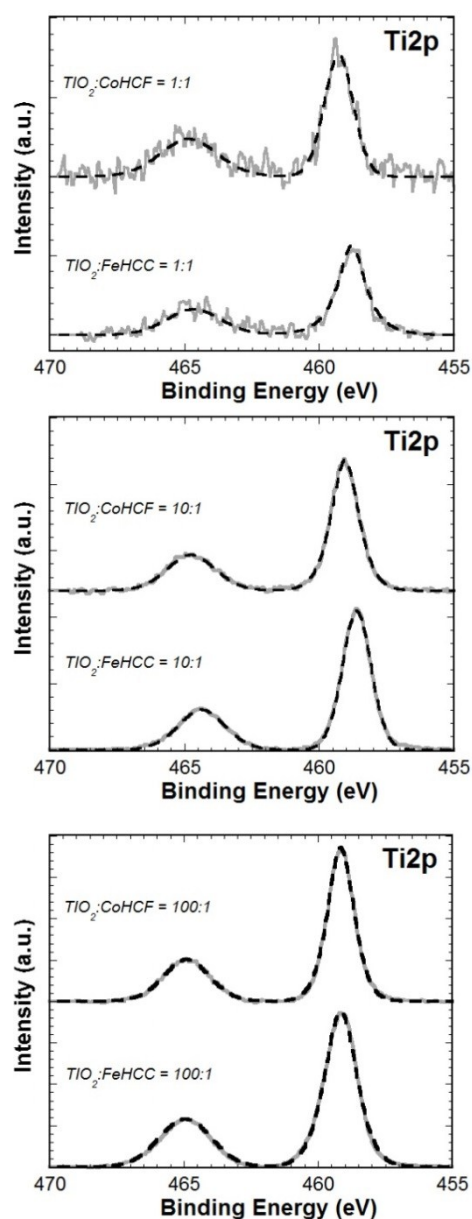

Fig. S10 Ti2p signal from  $\text{TiO}_2$ -CoHCF and  $\text{TiO}_2$ -FeHCC compounds at different  $\text{TiO}_2$ -MHCM ratios.



## XAS

The data were recorded at Ti K-edge (4965 eV), Fe K-edge (7112 eV) and Co K-edge (77709 eV) in transmission mode using a ionization chamber filled with a mixture of Kr, Ar, N<sub>2</sub> and He in order to have 20%, 70% and 95% of absorption in the I0, I1 and I2 ion chambers, for all working energy range. The beam was monochromatized using a fixed exit monochromator equipped with a pair of Si(111) crystals. Harmonics were rejected by using the cut-off of the reflectivity of the platinum mirror placed at 3 mrad with respect to the beam upstream the monochromator and by detuning the second crystal of the monochromator by 30% of the maximum. The energy was defined by assigning to 4965 eV, 7112 eV, and 7709 eV the first inflection point of the spectrum of a titanium, iron or cobalt foil, respectively. The spectra of metallic Ti, Fe, or Co were collected simultaneously to those of the samples. This allowed a continuous monitoring of the energy during consecutive scans. No energy drifts of the monochromator were observed during the experiments. Spectra were collected with 2 s/point acquisition time. The pre-edge background was removed by subtraction of a linear function extrapolated from the pre-edge region, and the raw spectra were normalized to the unity by extrapolation of the atomic background evaluated using a polynomial function.

Absorption Fine Structure (EXAFS) spectra taken at the Fe and Co K-edge , respectively.

- <sup>1</sup> M. P. Seah, *Surf. Interface Anal.*, 2001, **31**, 721.
- <sup>2</sup> N. Fairley, *CasaXPS*, version 2.3.15; 1999-2003.
- <sup>3</sup> D. A. Shirley, *Phys. Rev. B*, 1972, **5**, 4709.
- <sup>4</sup> M. P. Seah, *Quantification in AES and XPS*. In: Briggs D, Grant JT (eds) *Surface Analysis by Auger and X-Ray Photoelectron Spectroscopy*. IM Publication Surface Science Spectra, Manchester, 2003.
- <sup>5</sup> J. H. Scofield, *J. Electron. Spectrosc.*, 1976, **8**, 129.
- <sup>6</sup> R. F. Reilman, A. Msezane and S. T. J. Manson, *J. Electron. Spectrosc. Relat. Phenom.*, 1976, **8**, 389.
- <sup>7</sup> M. Fantauzzi, A. Pacella, J. Fournier, A. Gianfagna, G. B. Andreozzi and A. Rossi, *Anal. Bioanal. Chem.*, 2012, **404**, 821.
- <sup>8</sup> M. P. Seah and W. A. Dench, *Surf. Interface Anal.*, 1979, **1**, 2.

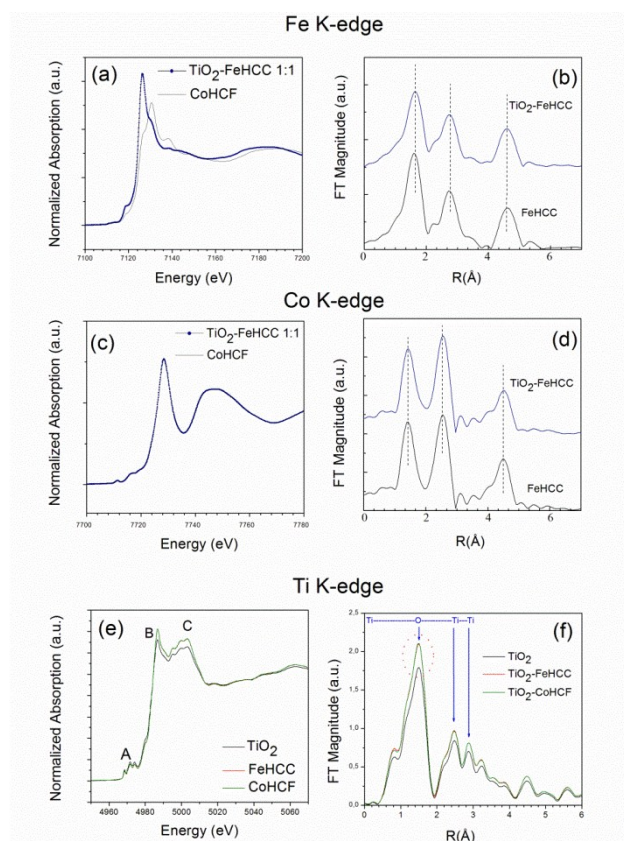

**Fig. S11** XAS results of the Iron Hexacyanocobaltate (FeHCC) sample. The normalized X-Ray Absorption Near Edge (XANES) spectra are displayed in the panels (a) and (c) respectively for the Fe and Co K-edge. Panels (b) and (d) show the experimental Fourier Transforms (FTs) of the Extended X-Ray
